## RESEARCH ARTICLE

# Vibegron shows high selectivity and potent agonist activity for $\beta$ 3-adrenoceptors, irrespective of receptor density

Shota Yamamoto<sup>1\*</sup>, Hotaka Kusabuka<sup>1</sup>, Akane Matsuzawa<sup>1</sup>, Itaru Maruyama<sup>1</sup>, Takanobu Yamazaki<sup>2</sup>

**1** Central Research Laboratories, Kissei Pharmaceutical Co., Ltd., Azumino, Nagano, Japan, **2** Watarase Research Center, Kyorin Pharmaceutical Co., Ltd., Nogi-machi, Tochigi, Japan

\* [shota\\_yamamoto@pharm.kissei.co.jp](mailto:shota_yamamoto@pharm.kissei.co.jp)

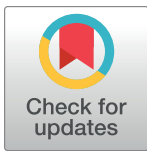

## OPEN ACCESS

**Citation:** Yamamoto S, Kusabuka H, Matsuzawa A, Maruyama I, Yamazaki T (2023) Vibegron shows high selectivity and potent agonist activity for  $\beta$ 3-adrenoceptors, irrespective of receptor density. PLoS ONE 18(9): e0290685. <https://doi.org/10.1371/journal.pone.0290685>

**Editor:** Fábio Henrique Silva, Sao Francisco University: Universidade Sao Francisco, BRAZIL

**Received:** May 2, 2023

**Accepted:** August 14, 2023

**Published:** September 1, 2023

**Copyright:** © 2023 Yamamoto et al. This is an open access article distributed under the terms of the [Creative Commons Attribution License](https://creativecommons.org/licenses/by/4.0/), which permits unrestricted use, distribution, and reproduction in any medium, provided the original author and source are credited.

**Data Availability Statement:** All relevant data are within the paper.

**Funding:** The authors received no specific funding for this work. Kissei Pharmaceutical Co., Ltd., [https://www.kissei.co.jp/e\\_contents/](https://www.kissei.co.jp/e_contents/), and Kyorin Pharmaceutical Co., Ltd., <https://www.kyorin-pharm.co.jp/en/>, provided support in the form of salaries for authors SY (Kissei), HK (Kissei), AM (Kissei), IM (Kissei) and TY (Kyorin) and acquisition of research materials, but did not have any additional role in the study design, data

## Abstract

$\beta$ 3-Adrenoceptor (AR) agonists are used to treat patients with an overactive bladder (OAB). Clinical proof-of-concept data have been obtained for the  $\beta$ 3-AR agonists vibegron, mirabegron, solabegron, and ritobegron; however, the selectivities of these agents have not been compared directly under the same experimental conditions. Moreover, the bladders of some patients express lower  $\beta$ 3-AR densities than those of healthy individuals, and the  $\beta$ 3-AR density might be expected to affect agonist activity. This study assessed the  $\beta$ 3-AR selectivities of four  $\beta$ 3-AR agonists and examined the effects of  $\beta$ -AR density on their pharmacological profiles. Functional cellular assays were performed using Chinese hamster ovary-K1 cells expressing three human  $\beta$ -AR subtypes transfected with different amounts of plasmid DNA (0.1, 0.05, 0.025  $\mu$ g/well). The half-maximal effective concentration values, intrinsic activities (IAs), and  $\beta$ 3-AR selectivities of vibegron, mirabegron, solabegron, and ritobegron were calculated to assess their pharmacological profiles. The  $\beta$ 3-AR selectivities of vibegron, mirabegron, solabegron, and ritobegron were >7937-, 517-, 21.3-, and >124-fold higher than for  $\beta$ 1-ARs, and >7937-, 496-, >362- and 28.1-fold higher than for  $\beta$ 2-ARs, respectively, under the same experimental conditions. The IAs of mirabegron, solabegron, and ritobegron decreased in line with decreasing receptor density, while the IA of vibegron was maintained at the same level as that of the full agonist isoproterenol at various  $\beta$ 3-AR densities. Vibegron has high  $\beta$ 3-AR selectivity and exhibits full agonist activity, regardless of the  $\beta$ 3-AR density. These results suggest that vibegron is a highly effective and safe drug for treating OAB.

## Introduction

Overactive bladder (OAB) is a symptom complex characterized by a sensation of urgency, with or without urge incontinence, usually accompanied by frequency and nocturia [1]. The medical management of OAB has traditionally relied on antimuscarinics [2]; however, although antimuscarinics have been demonstrated to improve symptoms of OAB, they also

collection and analysis, decision to publish, or preparation of the manuscript.

**Competing interests:** This study was funded by Kissei Pharmaceutical Co., Ltd. Shota Yamamoto, Hotaka Kusabuka, Akane Matsuzawa and Itaru Maruyama are current employees of Kissei. Vibegron is provided by Kyorin Pharmaceutical Co., Ltd. The active form of ritobegron is synthesized in Kissei. The other materials and compounds used in this study are commercially available. This does not alter the author's adherence to all the PLOS ONE policies on sharing data and materials, as detailed online in the guide for authors. There are no patents, products in development or marketed products associated with this research to declare.

have adverse effects including dry mouth, constipation, and blurred vision, which might prompt treatment discontinuation [3]. In addition, growing evidence suggests that antimuscarinics may increase the risk of dementia in older adults [4].  $\beta$ 3-Adrenoceptor (AR) agonists have recently been used as a new class of therapeutic agents for OAB [5]. The efficacy of  $\beta$ 3-AR agonists is comparable to that of antimuscarinics, but the adverse effect profile is better, and they are not thought to be associated with dementia [3,4].  $\beta$ 3-AR agonists are thus now used to treat OAB in many patients, including the elderly [6,7].

$\beta$ -ARs are subclassified into three subtypes:  $\beta$ 1-,  $\beta$ 2-, and  $\beta$ 3-ARs. In 1999, three research groups independently reported that  $\beta$ 3-AR mRNA was expressed in human detrusor muscle [8–10], and two of these groups also revealed that  $\beta$ 3-ARs were mainly involved in human bladder relaxation [9,10]. Several pharmaceutical companies subsequently entered their  $\beta$ 3-AR agonists into clinical development programs for the treatment of OAB. Four  $\beta$ 3-AR agonists, mirabegron, vibegron, solabegron, and ritobegron, underwent clinical proof-of-concept studies, and only the first two have obtained regulatory approval in several countries to date. The reasons for the success of these two drugs are unknown, but their  $\beta$ 3-AR selectivities may be an important factor, given that  $\beta$ 1- and  $\beta$ 2-AR stimulation affect cardiac function [11,12]. However, although several studies have examined the  $\beta$ -AR selectivity of individual drugs [13–16], no studies have directly compared the  $\beta$ 3-AR selectivities of these four drugs under the same experimental conditions.

Expression levels of  $\beta$ 3-ARs have been reported to vary according to the pathology. For example,  $\beta$ 3-AR mRNA expression was significantly decreased in the bladder mucosa in patients with severe bladder outlet obstruction (BOO) compared with mild BOO and controls [17]. In addition, a recent study showed that bladders of patients with urinary incontinence expressed a lower density of  $\beta$ 3-ARs than those of healthy individuals [18]. Furthermore, the potency and efficacy of  $\beta$ 3-AR agonists depended on the  $\beta$ 3-AR density on the cell membrane [19]. These results suggest that the expected effects of these agents may not be achieved in patients with such pathologies. There is thus a need to assess the pharmacological profiles in relation to receptor density.

Vibegron is a novel, potent, and selective  $\beta$ 3-AR agonist that was recently licensed for the treatment of OAB in Japan and the United States [20,21]. In the current study, we examined the pharmacological profiles of vibegron, mirabegron, solabegron, and ritobegron under the same experimental conditions, and compared the selectivities of the four drugs for each  $\beta$ -AR subtype. We also evaluated the effects of different  $\beta$ -AR densities on the pharmacological profile of each drug.

## Materials and methods

### Drugs

Vibegron was obtained from Kyorin Pharmaceutical Co., Ltd. (Tokyo, Japan), the active form of ritobegron was synthesized in our laboratory (Kissei Pharmaceutical Co., Ltd., Nagano, Japan) [22]. The following drugs were obtained from commercial sources: mirabegron (ChemScene, NJ, USA), solabegron (MedChemExpress, NJ, USA), (–)-isoprenaline (+)-bitartrate (isoproterenol) (Sigma-Aldrich, St. Louis, MO, USA), and dimethylsulfoxide (Fujifilm Wako Pure Chemical, Osaka, Japan). Each drug was dissolved in dimethylsulfoxide.

### Cell culture and transfection of human $\beta$ -ARs

Chinese hamster ovary (CHO)-K1 cells (DS Pharma Biomedical Co., Ltd., Osaka, Japan) were cultured in Ham's F-12 medium containing 10% fetal bovine serum under 5% CO<sub>2</sub> at 37°C. For cAMP assay, 2×10<sup>5</sup> cells/mL were inoculated onto a 96-well plate at 100  $\mu$ L/well. For

membrane preparation experiments, the cells were inoculated onto 150 mm dishes with the same number of cells per culture area as for the 96-well plate. The cells were cultured for about 24 h and used for  $\beta$ -AR transfection (see below). The DNA sequences encoding  $\beta$ 1-AR (P08588.2),  $\beta$ 2-AR (NP\_000015.1), or  $\beta$ 3-AR (NP\_000016.1) were cloned into a pCI-Neo expression vector (Promega, WI, USA). CHO-K1 cells expressing  $\beta$ 1-AR,  $\beta$ 2-AR, or  $\beta$ 3-AR were constructed by transfection with the appropriate plasmid DNA ( $\beta$ 1-,  $\beta$ 2-, or  $\beta$ 3-AR) using Lipofectamine 2000 (Life Technologies Japan Ltd., Tokyo, Japan), according to the manufacturer's instructions. Human  $\beta$ -AR plasmid DNA was diluted with Opti-MEM (Life Technologies Japan Ltd.) (0.1  $\mu$ g plasmid DNA/25  $\mu$ L Opti-MEM) for each subtype. Lipofectamine was diluted with Opti-MEM (0.5  $\mu$ L Lipofectamine/25  $\mu$ L Opti-MEM) and incubated for 5 min at room temperature. Solutions containing plasmid DNA and Lipofectamine, respectively, were mixed in equal amounts and incubated for 20 min at room temperature. The mixture (50  $\mu$ L/well or 23.735 mL/dish) was added to the above CHO-K1 cells inoculated onto a 96-well plate or 150 mm dish. The transfected CHO-K1 cells were then cultured for about 24 h and used for the following experiments. Similar experiments were performed after reducing the amounts of transfected plasmid DNA to 0.05 and 0.025  $\mu$ g.

### cAMP assay

Cells that had been cultured for about 24 h after transfection were subjected to cAMP assay. The cells were incubated with vibegron, mirabegron, solabegron, ritobegron, or isoproterenol for 30 min at 37°C in the presence of 0.5 mM 3-isobutyl-1-methylxanthine, and intracellular cAMP accumulation was evaluated using a cAMP Gs Dynamic kit (PerkinElmer, MA, USA). Fluorescence emissions at 665 nm and 620 nm were detected using a PHERAstar FSX plate reader (BMG-Labtech Japan Ltd., Saitama, Japan).

### Membrane preparations

At 24 h post-transfection, cells in 150 mm dishes were washed with Dulbecco's phosphate-buffered saline and detached with a cell scraper into 10 mM HEPES buffer (pH 7.4) containing 154 mM NaCl, 0.7 mM EDTA-2Na, and protease inhibitor cocktail (Nacalai Tesque, Kyoto, Japan) (membrane preparation buffer). The buffer was then removed by centrifugation at 1880  $\times g$  for 10 min, the cells were resuspended in membrane preparation buffer, and centrifuged at 1880  $\times g$  for 10 min. After removing the buffer, the cells were resuspended in homogenate buffer (6.6 mM HEPES, 102.7 mM NaCl, 3.3 mM NaHCO<sub>3</sub>, 2.1 mM EDTA-2Na, and protease inhibitor cocktail, pH 7.4) and frozen at -80°C for 1 h. The cells were thawed and homogenized using an ultrasonic homogenizer. Nuclei were removed by centrifugation at 1310  $\times g$  for 10 min, and the membrane fraction was centrifuged at 92,691  $\times g$  for 60 min at 4°C. The pellet was resuspended in 10 mM HEPES buffer (pH 7.4) containing 0.1 mM EDTA-2Na and stored at -80°C until use. Protein concentration was determined using a Pierce BCA Protein Assay kit (Thermo Fisher Scientific, Waltham, MA, USA).

### Radioligand-binding assay

Aliquots of membrane preparations resuspended in binding buffer (20 mM HEPES, 100 mM NaCl, and 10 mM MgCl<sub>2</sub>, pH 7.4) were incubated with [<sup>125</sup>I]-iodocyanopindolol (ICYP) (PerkinElmer) for 90 min in a final volume of 200  $\mu$ L at 27°C for each  $\beta$ -AR.  $\beta$ 1-,  $\beta$ 2-, and  $\beta$ 3-AR saturation binding assays were carried out using [<sup>125</sup>I]-ICYP ligands, ranging from 16–1000, 16–1000, and 31–2000 pM, respectively. Nonspecific binding was determined in the presence of 10  $\mu$ M alprenolol for  $\beta$ 1- and  $\beta$ 2-ARs and 100  $\mu$ M SR59230A for  $\beta$ 3-ARs. After incubation, the membranes were filtered onto a 96-well white microplate with bonded GF/B filter

preincubated in 0.3% polyethylenimine for 30 min and washed four times with ice-cold wash buffer (50 mM Tris-HCl buffer, pH 7.4). Radioactivity on the filter was counted using a MicroBeta2 microplate counter (PerkinElmer) with quenching correction, after the addition of 100  $\mu$ L of Microscint 20 (PerkinElmer) and shaking for 5 min. Saturation experiments were analyzed by GraphPad Prism 6.0 (GraphPad software, San Diego, CA, USA) using the rectangular hyperbolic equation derived from the equation of a bimolecular reaction and the law of mass action:  $B = (B_{\max} \times [F]) / (K_D + [F])$ , where B is the amount of ligand bound at equilibrium,  $B_{\max}$  is the maximum number of binding sites, [F] is the concentration of free ligand, and  $K_D$  is the ligand dissociation constant.

## Data analysis

In the cAMP assay, the half-maximal effective concentration ( $EC_{50}$ ) value was calculated for each agonist based on its concentration–response curve using GraphPad Prism 6.0 nonlinear regression analysis. The intrinsic activity (IA) of each drug was calculated as the proportion of the maximum response to  $1 \times 10^{-5}$  M when the maximum response to isoproterenol was taken as 1.00. When the IA of the drug was  $>0.5$ , an  $EC_{50}$  value was calculated.  $\beta$ 3-AR selectivity was calculated by comparing the  $EC_{50}$  values. The concentration of each drug required to produce a 50% maximal response induced by isoproterenol ( $Iso_{50}$ ) was calculated to assess the potency of the drugs.

## Results

### $EC_{50}$ , IA, and $\beta$ 3-AR selectivity for each $\beta$ 3 agonist

Cells transfected with 0.1  $\mu$ g/well, which allowed sufficient evaluation of the agonistic activities of the drugs for each  $\beta$ -AR, were used in the experiments. All four drugs (vibegron, mirabegron, solabegron, and ritobegron) induced a concentration-dependent increase in the accumulation of cAMP in cells expressing  $\beta$ 3-ARs (Fig 1A), with  $EC_{50}$  values of 1.26, 1.15, 27.6, and 80.8 nM and IAs of 0.93, 0.94, 0.96, and 0.99, respectively (Table 1). In cells expressing  $\beta$ 1- and  $\beta$ 2-ARs, the  $EC_{50}$  value for vibegron was  $>10$   $\mu$ M. Mirabegron and solabegron also had agonist activities in cells expressing  $\beta$ 1-ARs, with  $EC_{50}$  values of 594 and 588 nM, respectively, while mirabegron and ritobegron had agonist activities in cells expressing  $\beta$ 2-ARs, with  $EC_{50}$  values of 570 and 2273 nM, respectively (Fig 1B and 1C and Table 1). The  $\beta$ 3-AR selectivities of vibegron, mirabegron, solabegron, and ritobegron were thus  $>7937$ -, 517-, 21.3-, and  $>124$ -fold higher than for  $\beta$ 1-ARs, and  $>7937$ -, 496-,  $>362$ -, and 28.1-fold higher than for  $\beta$ 2-ARs under the same experimental conditions (Table 1). Vibegron thus had the highest  $\beta$ 3 selectivity among the four drugs.

### $\beta$ -AR agonist activity profiles of drugs in cells with different receptor densities

The densities of  $\beta$ -ARs expressed on the cell membrane were evaluated by radioligand-binding assay. The  $B_{\max}$  values in cells transfected with 0.1, 0.05, and 0.025  $\mu$ g/well were 781, 245, and 153 fmol/mg for  $\beta$ 1-ARs, 713, 231, and 108 fmol/mg for  $\beta$ 2-ARs, and 347, 222, and 116 fmol/mg for  $\beta$ 3-ARs, respectively (Table 2), and these decreased as the amount of transfected  $\beta$ -AR plasmid DNA decreased in all  $\beta$ -AR subtypes.

In cells expressing  $\beta$ 3-ARs, the  $EC_{50}$  and IA of each drug were compared between cells transfected with 0.05 and 0.025  $\mu$ g/well. As observed in the cAMP assay, the concentration–response curves were shifted to the right or below and the  $EC_{50}$  values increased as the amount of plasmid DNA decreased, except for solabegron (Table 3 and Fig 2A and 2B). The IAs of vibegron in cells transfected with 0.05 and 0.025  $\mu$ g/well were 1.00 and 1.07, respectively, and

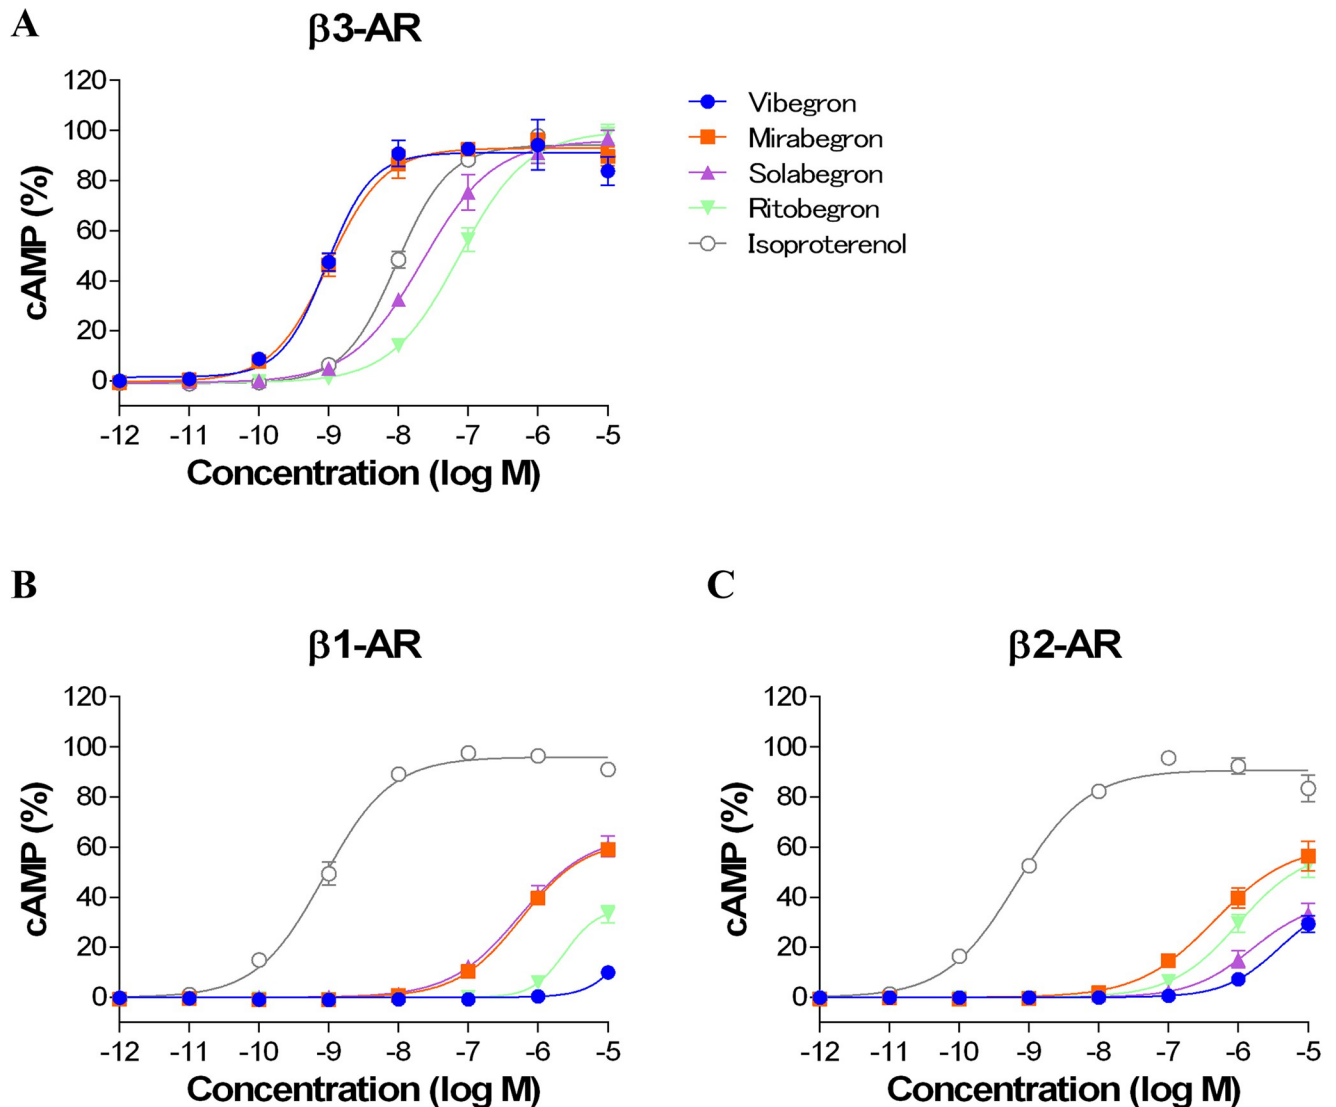

**Fig 1.** Effects of vibegron, mirabegron, solabegron, ritobegron, and isoproterenol on cAMP accumulation in CHO-K1 cells transfected with 0.1  $\mu$ g/well plasmid DNA for human  $\beta_3$ -adrenoceptor (AR) (A),  $\beta_1$ -AR (B), or  $\beta_2$ -AR (C). Each cAMP level expressed as mean  $\pm$  standard error (SEM), taking the maximum response to isoproterenol as 100%. Each point expressed as mean  $\pm$  SEM of four (vibegron, mirabegron, solabegron, and ritobegron) or eight (isoproterenol) experiments.

<https://doi.org/10.1371/journal.pone.0290685.g001>

these were maintained at the same level as that of isoproterenol, regardless of the receptor density. In contrast, the IAs of mirabegron, solabegron, and ritobegron were 0.84, 0.91, and 1.00 in cells transfected with 0.05  $\mu$ g/well, and 0.66, 0.68, and 0.85 in cells transfected with 0.025  $\mu$ g/well, respectively, and all decreased with decreasing receptor density (Table 3).

In cells expressing  $\beta_1$ - and  $\beta_2$ -ARs, the  $EC_{50}$  values of all four drugs were  $>10$   $\mu$ M (Table 3 and Fig 2C–2F). The IAs of all drugs decreased in cells transfected with 0.025  $\mu$ g/well compared with cells transfected with 0.05  $\mu$ g/well (Table 3).

### Potency of each $\beta_3$ -AR agonist

The  $EC_{50}$  values of vibegron, mirabegron, solabegron, and ritobegron in  $\beta_3$ -AR-expressing cells transfected with 0.025  $\mu$ g/well were 12.5, 4.17, 83.6, and 1523 nM, respectively (Table 3).

**Table 1.** Effects of vibegron, mirabegron, solabegron, ritobegron, and isoproterenol on cAMP accumulation and  $\beta_3$ -adrenoceptor (AR) selectivities in CHO-K1 cells expressing human  $\beta$ -ARs.

| Drug          | EC <sub>50</sub> (nM)<br>(Intrinsic activity) |               |               | $\beta_3$ -AR selectivity |                  |
|---------------|-----------------------------------------------|---------------|---------------|---------------------------|------------------|
|               | $\beta_1$ -AR                                 | $\beta_2$ -AR | $\beta_3$ -AR | vs $\beta_1$ -AR          | vs $\beta_2$ -AR |
| Vibegron      | >10,000                                       | >10,000       | 1.26 ± 0.40   | >7937                     | >7937            |
|               | (0.10 ± 0.01)                                 | (0.29 ± 0.03) | (0.93 ± 0.05) |                           |                  |
| Mirabegron    | 594 ± 122                                     | 570 ± 235     | 1.15 ± 0.24   | 517                       | 496              |
|               | (0.59 ± 0.02)                                 | (0.56 ± 0.06) | (0.94 ± 0.02) |                           |                  |
| Solabegron    | 588 ± 105                                     | >10,000       | 27.6 ± 9.08   | 21.3                      | >362             |
|               | (0.60 ± 0.04)                                 | (0.33 ± 0.04) | (0.96 ± 0.03) |                           |                  |
| Ritobegron    | >10,000                                       | 2273 ± 1339   | 80.8 ± 12.6   | >124                      | 28.1             |
|               | (0.33 ± 0.03)                                 | (0.53 ± 0.05) | (0.99 ± 0.02) |                           |                  |
| Isoproterenol | 0.89 ± 0.14                                   | 0.78 ± 0.16   | 10.7 ± 1.67   | 0.08                      | 0.07             |
|               | (0.95 ± 0.01)                                 | (0.91 ± 0.02) | (0.95 ± 0.01) |                           |                  |

Data presented as mean ± standard error of four (vibegron, mirabegron, solabegron, and ritobegron) or eight (isoproterenol) experiments. Intrinsic activity calculated with cAMP accumulation as 1.00 in maximal response of isoproterenol for each  $\beta$ -AR.  $\beta_3$ -AR selectivity calculated by comparison between half-maximal effective concentration (EC<sub>50</sub>) values. CHO-K1 cells were transfected with 0.1  $\mu$ g/well plasmid DNA for human  $\beta$ -ARs.

<https://doi.org/10.1371/journal.pone.0290685.t001>

However, the EC<sub>50</sub> indicates the concentration that produces a response of 50% of the E<sub>max</sub> for that drug, and in the case of partial agonists, the EC<sub>50</sub> was lower than the 50% of E<sub>max</sub> response for isoproterenol (Fig 2). We therefore calculated the Iso<sub>50</sub> to assess the potency of each drug for  $\beta_3$ -ARs. The rank of Iso<sub>50</sub> value was 22.5 nM (vibegron) < 26.9 nM (mirabegron) < 252 nM (solabegron) < 943 nM (ritobegron) in  $\beta_3$ -AR-expressing cells transfected with 0.025  $\mu$ g/well, with similar trends for the other transfection conditions (Table 4).

## Discussion

In the present study, we evaluated the agonist activity of the  $\beta_3$ -AR agonists vibegron, mirabegron, solabegron, and ritobegron, developed for the treatment of OAB, against each  $\beta$ -AR subtype ( $\beta_1$ -,  $\beta_2$ -, and  $\beta_3$ -ARs), using functional assays indexed to cAMP accumulation, and compared their  $\beta_3$ -AR selectivities. Differences in  $\beta_3$ -AR selectivity were observed among the four drugs, in the order vibegron > mirabegron > solabegron = ritobegron. Vibegron showed the highest  $\beta_3$ -AR selectivity, which was >7937-fold higher than for  $\beta_1$ - and  $\beta_2$ -ARs. Mirabegron showed similar  $\beta_3$ -AR agonist activity to vibegron, but it also demonstrated agonist activity for  $\beta_1$ - and  $\beta_2$ -ARs (EC<sub>50</sub> = 594 and 570 nM), with  $\beta_3$ -AR selectivities of 517-fold for  $\beta_1$ -ARs and 496-fold for  $\beta_2$ -ARs. To date, no studies have clearly demonstrated the direct agonist activity of mirabegron in  $\beta_1$ - and  $\beta_2$ -ARs, although it has shown affinities for  $\beta_1$ - and

**Table 2.** B<sub>max</sub> values of [<sup>125</sup>I]-iodocyanopindolol binding to human  $\beta_1$ -,  $\beta_2$ -, and  $\beta_3$ -adrenoceptor (AR) sites on CHO-K1 cells transfected with each  $\beta$ -AR plasmid DNA.

| Amount of plasmid DNA ( $\mu$ g/well) | B <sub>max</sub> (fmol/mg) |               |               |
|---------------------------------------|----------------------------|---------------|---------------|
|                                       | $\beta_1$ -AR              | $\beta_2$ -AR | $\beta_3$ -AR |
| 0.1                                   | 781 ± 24                   | 713 ± 41      | 347 ± 25      |
| 0.05                                  | 245 ± 13                   | 231 ± 3       | 222 ± 11      |
| 0.025                                 | 153 ± 7                    | 108 ± 5       | 116 ± 22      |

Data presented as mean ± standard error of three experiments. B<sub>max</sub>, maximum number of binding sites.

<https://doi.org/10.1371/journal.pone.0290685.t002>

**Table 3. Effects of vibegron, mirabegron, solabegron, ritobegron, and isoproterenol on cAMP accumulation in CHO-K1 cells expressing human  $\beta$ -adrenoceptors (ARs) under different plasmid DNA transfection (TF) conditions.**

| Drug          | EC <sub>50</sub> (nM)<br>(Intrinsic activity) |                   |                   |                       |                   |                   |
|---------------|-----------------------------------------------|-------------------|-------------------|-----------------------|-------------------|-------------------|
|               | TF 0.05 $\mu$ g/well                          |                   |                   | TF 0.025 $\mu$ g/well |                   |                   |
|               | $\beta_1$ -AR                                 | $\beta_2$ -AR     | $\beta_3$ -AR     | $\beta_1$ -AR         | $\beta_2$ -AR     | $\beta_3$ -AR     |
| Vibegron      | >10,000                                       | >10,000           | 3.83 $\pm$ 0.93   | >10,000               | >10,000           | 12.5 $\pm$ 2.41   |
|               | (0.02 $\pm$ 0.01)                             | (0.09 $\pm$ 0.03) | (1.00 $\pm$ 0.03) | (0.00 $\pm$ 0.00)     | (0.03 $\pm$ 0.01) | (1.07 $\pm$ 0.14) |
| Mirabegron    | >10,000                                       | >10,000           | 2.81 $\pm$ 0.60   | >10,000               | >10,000           | 4.17 $\pm$ 0.89   |
|               | (0.38 $\pm$ 0.02)                             | (0.31 $\pm$ 0.05) | (0.84 $\pm$ 0.04) | (0.25 $\pm$ 0.03)     | (0.20 $\pm$ 0.03) | (0.66 $\pm$ 0.06) |
| Solabegron    | >10,000                                       | >10,000           | 85.1 $\pm$ 5.84   | >10,000               | >10,000           | 83.6 $\pm$ 29.0   |
|               | (0.28 $\pm$ 0.04)                             | (0.20 $\pm$ 0.02) | (0.91 $\pm$ 0.10) | (0.25 $\pm$ 0.06)     | (0.14 $\pm$ 0.03) | (0.68 $\pm$ 0.05) |
| Ritobegron    | >10,000                                       | >10,000           | 398 $\pm$ 104     | >10,000               | >10,000           | 1523 $\pm$ 950    |
|               | (0.11 $\pm$ 0.02)                             | (0.32 $\pm$ 0.05) | (1.00 $\pm$ 0.07) | (0.04 $\pm$ 0.01)     | (0.22 $\pm$ 0.03) | (0.85 $\pm$ 0.04) |
| Isoproterenol | 2.39 $\pm$ 0.21                               | 2.93 $\pm$ 0.52   | 34.0 $\pm$ 6.87   | 3.21 $\pm$ 0.54       | 3.64 $\pm$ 0.49   | 70.3 $\pm$ 14.2   |
|               | (0.94 $\pm$ 0.01)                             | (0.97 $\pm$ 0.01) | (0.96 $\pm$ 0.02) | (0.91 $\pm$ 0.01)     | (0.95 $\pm$ 0.02) | (0.97 $\pm$ 0.01) |

Data presented as mean  $\pm$  standard error of four (vibegron, mirabegron, solabegron, and ritobegron) or eight (isoproterenol) experiments. Intrinsic activity calculated with cAMP accumulation taken as 1.00 in maximal response of isoproterenol for each  $\beta$ -AR. EC<sub>50</sub>, half-maximal effective concentration.

<https://doi.org/10.1371/journal.pone.0290685.t003>

$\beta_2$ -ARs in binding assays, with inhibition constants (K<sub>i</sub>) values of 383 and 977 nM, respectively [23]. The current functional assay results may reflect the binding affinity of mirabegron for each  $\beta$ -AR subtype. Previous studies have reported the  $\beta_3$ -AR selectivity of each drug individually [13–16], but experimental conditions have differed among the studies, making it difficult to compare the selectivities of the four drugs. In the current study, we compared the drugs under identical conditions, and showed that vibegron and mirabegron had higher  $\beta_3$ -AR selectivities than solabegron and ritobegron.

Both  $\beta_1$ - and  $\beta_2$ -ARs are expressed in the heart, and drugs with poor  $\beta_3$ -AR selectivity may thus produce cardiovascular side effects, such as increased heart rate and force of contraction [11,12]. Drugs with weaker effects on  $\beta_1$ - and  $\beta_2$ -ARs, at doses resulting in adequate agonist activity on  $\beta_3$ -ARs, may thus be more desirable for the treatment of OAB. The two drugs currently used in clinical practice, vibegron and mirabegron, have high selectivity for  $\beta_3$ -ARs and are thus therefore considered to be safe.

The  $\beta_3$ -AR density in the urinary bladder has been reported to differ according to the disease pathology [18], and the agonist activities of the compounds may thus differ according to the receptor density on the plasma membrane [19]. We therefore examined the effect of  $\beta$ -AR density on the plasma membrane on the pharmacological profile of each drug. In  $\beta_1$ - or  $\beta_2$ -AR-expressing cells, the IAs of all four drugs decreased with decreasing receptor density. In contrast, in  $\beta_3$ -AR-expressing cells, the IAs for mirabegron, solabegron, and ritobegron decreased with decreasing receptor density, but no such change occurred for vibegron. The detailed reasons for the IA decreases with the former three agonists are unknown. However, agonists with potency emanating from high efficacy are called efficacy-dominant agonists, while other agonists with potency emanating from high affinity and concomitant low efficacy are called affinity-dominant agonists [24]. The maximal responses to efficacy-dominant agonists are more resistant to decreases in receptor density than the responses to affinity-dominant agonists [24]. Vibegron may thus be classified as efficacy-dominant agonists. In a recent study comparing the agonist activity profiles of vibegron and mirabegron, the respective IAs (E<sub>max</sub>) differed between 99.2% and 80.4%, respectively [25]. The current results also showed differences in the IAs of vibegron and mirabegron depending on the receptor density. It is

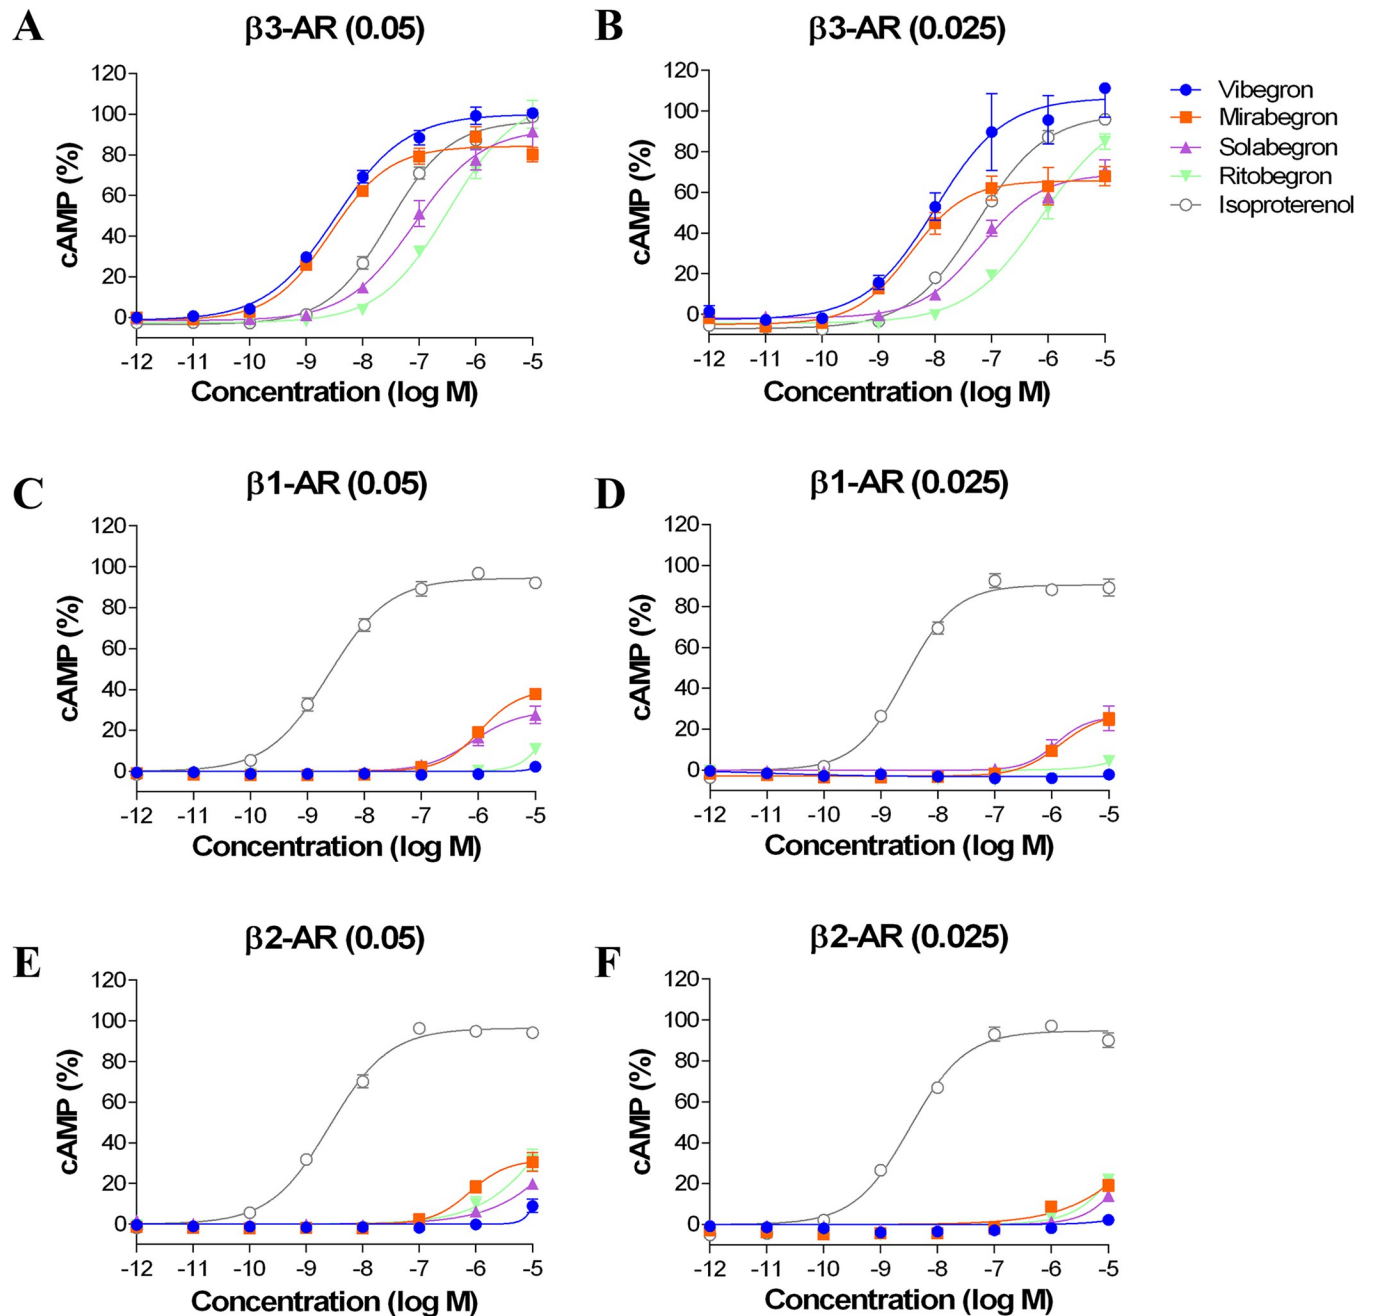

**Fig 2.** Effects of vibegron, mirabegron, solabegron, ritobegron, and isoproterenol on cAMP accumulation in CHO-K1 cells transfected with 0.05  $\mu\text{g/well}$  plasmid DNA (A, C, E) and 0.025  $\mu\text{g/well}$  plasmid DNA (B, D, F) for each  $\beta$ -adrenoceptor (AR) subtype. Each cAMP level expressed as mean  $\pm$  standard error (SEM), taking the maximum response to isoproterenol as 100%. Each point expressed as mean  $\pm$  SEM of four (vibegron, mirabegron, solabegron, and ritobegron) or eight (isoproterenol) experiments.

<https://doi.org/10.1371/journal.pone.0290685.g002>

therefore important to consider  $\beta_3$ -AR densities approximating those in human bladders when comparing the pharmacological profiles of drugs.

Significant reductions in  $\beta_3$ -AR mRNA expression have been reported in the bladders of subjects with severe BOO compared with mild BOO and healthy individuals [17]. In addition, the  $\beta_3$ -AR density in the bladder in healthy individuals was reported to be 155 fmol/mg,



**Table 4. Potency of  $\beta_3$ -adrenoceptor (AR) agonists assessed by cAMP accumulation in CHO-K1 cells expressing human  $\beta_3$ -AR under different plasmid DNA transfection (TF) conditions.**

| Drug          | Iso <sub>50</sub> (nM) |                      |                       |
|---------------|------------------------|----------------------|-----------------------|
|               | TF 0.1 $\mu$ g/well    | TF 0.05 $\mu$ g/well | TF 0.025 $\mu$ g/well |
|               | 347 fmol/mg            | 222 fmol/mg          | 116 fmol/mg           |
| Vibegron      | 1.26 $\pm$ 0.29        | 3.74 $\pm$ 0.73      | 22.5 $\pm$ 14.5       |
| Mirabegron    | 1.32 $\pm$ 0.26        | 4.45 $\pm$ 0.66      | 26.9 $\pm$ 7.51       |
| Solabegron    | 31.0 $\pm$ 10.8        | 119 $\pm$ 27.1       | 252 $\pm$ 78.4        |
| Ritobegron    | 81.5 $\pm$ 15.4        | 303 $\pm$ 60.7       | 943 $\pm$ 244         |
| Isoproterenol | 11.8 $\pm$ 1.78        | 37.9 $\pm$ 6.40      | 78.0 $\pm$ 10.9       |

Data presented as mean  $\pm$  standard error of four (vibegron, mirabegron, solabegron, and ritobegron) or eight (isoproterenol) experiments. Iso<sub>50</sub>, the concentration of each drug required to produce a 50% of the maximal response induced by isoproterenol.

<https://doi.org/10.1371/journal.pone.0290685.t004>

compared with 100 fmol/mg in patients with incontinence [18]. In the present study,  $\beta_3$ -AR densities in cells transfected with 0.025  $\mu$ g/well ( $B_{max}$  116 fmol/mg) approximated the density in the urinary bladder in incontinent patients. Under these conditions, vibegron showed full agonist activity (IA = 1.07) and ritobegron showed strong agonist activity (IA = 0.85), but mirabegron and solabegron showed only partial agonist activity (IA = 0.66, 0.68, respectively). Notably, there were clear differences in the IAs of vibegron and mirabegron, although both drugs are used in clinical practice.

Based on the maximum ( $C_{max}$ ) and minimum observed plasma concentrations ( $C_{min}$ ) of once-daily 50 mg vibegron and mirabegron [26,27], as the recommended Japanese clinical doses, the  $C_{max,u}$  and  $C_{min,u}$  for the unbound forms, taking into account the plasma-protein-binding rate of each drug, were calculated as 56 nM and 14 nM for vibegron and 20 nM and 3 nM for mirabegron, respectively. Applying these values to the dose-response curve of  $\beta_3$ -AR-expressing cells transfected with 0.025  $\mu$ g/well, the cAMP activity of vibegron was calculated to be about 82% in  $C_{max,u}$  and 59% in  $C_{min,u}$ , while the cAMP activity of mirabegron was about 53% in  $C_{max,u}$  and decreased to about 27% in  $C_{min,u}$ . These findings indicate that vibegron maintained strong  $\beta_3$ -AR agonist activity compared with mirabegron, which could affect the relative efficacies of the two drugs in clinical practice, with vibegron acting more strongly and continuously in bladder tissues expressed  $\beta_3$ -ARs.

The desensitization of receptors is an important factor that negatively affects drug efficacy. Compared with  $\beta_2$ -AR, the  $\beta_3$ -AR has been reported to be less susceptible to desensitization because it lacks the C-terminal phosphorylation site involved in desensitization [28]. In addition,  $\beta_2$ - and  $\beta_3$ -AR are involved in bladder relaxation in rats [29]. Following pretreatment of isolated rat bladder strips with fenoterol, a  $\beta_2$ -AR selective agonist, and subsequent washout, marked attenuation of the bladder relaxant effect was observed after fresh addition of the drug, whereas the  $\beta_3$ -AR agonist mirabegron did not produce such attenuation [30]. Although this study did not evaluate the desensitization of  $\beta_3$ -AR by vibegron, in a 52-week long-term efficacy study, attenuation of the efficacy of 50 mg (therapeutic dose) and 100 mg (supratherapeutic dose) of vibegron was not observed [31]. Therefore, the possibility of desensitization of  $\beta_3$ -AR by vibegron is considered to be very low.

$\beta_1$ - and  $\beta_2$ -AR densities vary in the regions of the human heart, with  $\beta_1$ - and  $\beta_2$ -AR densities in pacemaker cells in the sinoatrial node, which control the heartbeat, being 4.2- and 2.6-fold higher, respectively, compared with the atrium [32]. The  $\beta_1$ - and  $\beta_2$ -AR densities in the human right atrium have been reported to be about 54 and 22 fmol/mg [11], and the densities in the human sinoatrial node are estimated to be about 227 fmol/mg and 57 fmol/mg,

respectively. In the current study, the  $\beta$ 1-AR density in cells transfected with 0.05  $\mu$ g/well (245 fmol/mg) was close to the estimated density in the human sinoatrial node, but vibegron showed no  $\beta$ 1-AR agonist activity in these cells. The lowest  $\beta$ 2-AR density in  $\beta$ 2-AR-expressing cells was 108 fmol/mg, which was higher than the estimated density in the human sinoatrial node, but vibegron also showed no  $\beta$ 2-AR agonist activity in these cells, suggesting that vibegron had no  $\beta$ 2-AR agonist activity in cells with receptors at densities similar to those in the human sinoatrial node. These results suggest that vibegron is unlikely to affect the heart rate via  $\beta$ 1- and  $\beta$ 2-ARs expressed in the sinoatrial node. Indeed, it has been reported that vibegron does not affect the incidence of increased blood pressure and hypertension at therapeutic doses in clinical trials [33,34]. Additionally, in a 52-week long-term clinical trial, a supratherapeutic dose (100 mg) of vibegron did not affect vital signs (systolic blood pressure, diastolic blood pressure, and pulse) [31], and our results support this clinical evidence.

## Conclusions

In this study, we evaluated the activities of the  $\beta$ 3-AR agonists vibegron, mirabegron, solabegron, and ritobegron on  $\beta$ -AR subtypes under the same experimental conditions, and determined the effects of receptor density on the pharmacological profiles of the drugs. Vibegron showed the highest  $\beta$ 3-AR selectivity and demonstrated full agonist activity, regardless of the  $\beta$ 3-AR density. These results suggest that vibegron is a highly effective and safe drug for the treatment of OAB.

## Acknowledgments

We thank Dr. Satoshi Tatemichi for his helpful comments on the manuscript.

## Author Contributions

**Conceptualization:** Itaru Maruyama.

**Data curation:** Shota Yamamoto, Hotaka Kusabuka, Akane Matsuzawa.

**Formal analysis:** Shota Yamamoto, Hotaka Kusabuka, Akane Matsuzawa.

**Investigation:** Hotaka Kusabuka, Akane Matsuzawa.

**Methodology:** Hotaka Kusabuka, Akane Matsuzawa, Itaru Maruyama.

**Project administration:** Itaru Maruyama.

**Supervision:** Itaru Maruyama.

**Validation:** Hotaka Kusabuka, Akane Matsuzawa.

**Visualization:** Shota Yamamoto.

**Writing – original draft:** Shota Yamamoto.

**Writing – review & editing:** Shota Yamamoto, Itaru Maruyama, Takanobu Yamazaki.

## References

1. Abrams P, Cardozo L, Fall M, Griffiths D, Rosier P, Ulmsten U, et al. Standardisation Sub-committee of the International Continence Society. The standardisation of terminology of lower urinary tract function: report from the Standardisation Sub-committee of the International Continence Society. *Neurourol Urodyn.* 2002; 21(2):167–78. <https://doi.org/10.1002/nau.10052> PMID: 11857671.
2. Abrams P, Andersson KE. Muscarinic receptor antagonists for overactive bladder. *BJU Int.* 2007 Nov; 100(5):987–1006. <https://doi.org/10.1111/j.1464-410X.2007.07205.x> PMID: 17922784.

3. Scarneci I, Lupu S, Bratu OG, Teodorescu A, Maxim LS, Brinza A, et al. Overactive bladder: A review and update. *Exp Ther Med*. 2021 Dec; 22(6):1444. <https://doi.org/10.3892/etm.2021.10879> Epub 2021 Oct 14. PMID: [34721686](https://pubmed.ncbi.nlm.nih.gov/34721686/); PMCID: PMC8549091.
4. Araklitis G, Robinson D. The cognitive safety of antimuscarinics in the treatment of overactive bladder. *Expert Opin Drug Saf*. 2020 Oct; 19(10):1303–1313. <https://doi.org/10.1080/14740338.2020.1817377> Epub 2020 Sep 8. PMID: [32857638](https://pubmed.ncbi.nlm.nih.gov/32857638/).
5. Lightner DJ, Gomelsky A, Souter L, Vasavada SP. Diagnosis and Treatment of Overactive Bladder (Non-Neurogenic) in Adults: AUA/SUFU Guideline Amendment 2019. *J Urol*. 2019 Sep; 202(3):558–563. <https://doi.org/10.1097/JU.000000000000309> Epub 2019 Aug 8. PMID: [31039103](https://pubmed.ncbi.nlm.nih.gov/31039103/).
6. Bell B, Avery A, Bishara D, Coupland C, Ashcroft D, Orrell M. Anticholinergic drugs and risk of dementia: Time for action? *Pharmacol Res Perspect*. 2021 May; 9(3):e00793. <https://doi.org/10.1002/prp2.793> PMID: [34087056](https://pubmed.ncbi.nlm.nih.gov/34087056/); PMCID: PMC8177062.
7. Menhaji K, Cardenas-Trowers OO, Chang OH, Hall EF, Ringel NE, Falk KN. Anticholinergic prescribing pattern changes of urogynecology providers in response to evidence of potential dementia risk. *Int Urogynecol J*. 2021 Oct; 32(10):2819–2826. <https://doi.org/10.1007/s00192-021-04736-8> Epub 2021 Mar 8. PMID: [33683426](https://pubmed.ncbi.nlm.nih.gov/33683426/).
8. Fujimura T, Tamura K, Tsutsumi T, Yamamoto T, Nakamura K, Koibuchi Y, et al. Expression and possible functional role of the beta3-adrenoceptor in human and rat detrusor muscle. *J Urol*. 1999 Feb; 161(2):680–5. PMID: [9915482](https://pubmed.ncbi.nlm.nih.gov/9915482/).
9. Takeda M, Obara K, Mizusawa T, Tomita Y, Arai K, Tsutsui T, et al. Evidence for beta3-adrenoceptor subtypes in relaxation of the human urinary bladder detrusor: analysis by molecular biological and pharmacological methods. *J Pharmacol Exp Ther*. 1999 Mar; 288(3):1367–73. PMID: [10027879](https://pubmed.ncbi.nlm.nih.gov/10027879/).
10. Igawa Y, Yamazaki Y, Takeda H, Hayakawa K, Akahane M, Ajisawa Y, et al. Functional and molecular biological evidence for a possible beta3-adrenoceptor in the human detrusor muscle. *Br J Pharmacol*. 1999 Feb; 126(3):819–25. <https://doi.org/10.1038/sj.bjp.0702358> PMID: [10188996](https://pubmed.ncbi.nlm.nih.gov/10188996/); PMCID: PMC1565863.
11. Steinfath M, Lavicky J, Schmitz W, Scholz H, Döring V, Kalmár P. Regional distribution of beta 1- and beta 2-adrenoceptors in the failing and nonfailing human heart. *Eur J Clin Pharmacol*. 1992; 42(6):607–11. <https://doi.org/10.1007/BF00265923> PMID: [1320570](https://pubmed.ncbi.nlm.nih.gov/1320570/).
12. Brodde OE, Michel MC. Adrenergic and muscarinic receptors in the human heart. *Pharmacol Rev*. 1999 Dec; 51(4):651–90. PMID: [10581327](https://pubmed.ncbi.nlm.nih.gov/10581327/).
13. Edmondson SD, Zhu C, Kar NF, Di Salvo J, Nagabukuro H, Sacre-Salem B, et al. Discovery of Vibegron: A Potent and Selective  $\beta_3$  Adrenergic Receptor Agonist for the Treatment of Overactive Bladder. *J Med Chem*. 2016 Jan 28; 59(2):609–23. <https://doi.org/10.1021/acs.jmedchem.5b01372> Epub 2016 Jan 8. PMID: [26709102](https://pubmed.ncbi.nlm.nih.gov/26709102/).
14. Takasu T, Ukai M, Sato S, Matsui T, Nagase I, Maruyama T, et al. Effect of (R)-2-(2-aminothiazol-4-yl)-4'-{2-[(2-hydroxy-2-phenylethyl)amino]ethyl} acetanilide (YM178), a novel selective beta3-adrenoceptor agonist, on bladder function. *J Pharmacol Exp Ther*. 2007 May; 321(2):642–7. <https://doi.org/10.1124/jpet.106.115840> Epub 2007 Feb 9. PMID: [17293563](https://pubmed.ncbi.nlm.nih.gov/17293563/).
15. Uehling DE, Shearer BG, Donaldson KH, Chao EY, Deaton DN, Adkison KK, et al. Biarylamine phenethanolamines as potent and selective beta3 adrenergic receptor agonists. *J Med Chem*. 2006 May 4; 49(9):2758–71. <https://doi.org/10.1021/jm0509445> PMID: [16640337](https://pubmed.ncbi.nlm.nih.gov/16640337/).
16. Maruyama I, Goi Y, Tatemichi S, Maruyama K, Hoyano Y, Yamazaki Y, et al. Bladder selectivity of the novel  $\beta_3$ -agonist ritobegron (KUC-7483) explored by in vitro and in vivo studies in the rat. *Naunyn Schmiedeberg Arch Pharmacol*. 2012 Aug; 385(8):845–52. <https://doi.org/10.1007/s00210-012-0755-x> Epub 2012 May 3. PMID: [22552730](https://pubmed.ncbi.nlm.nih.gov/22552730/).
17. Kurizaki Y, Ishizuka O, Imamura T, Ishikawa M, Ichino M, Ogawa T, et al. Relationship between expression of  $\beta_3$ -adrenoceptor mRNA in bladder mucosa and urodynamic findings in men with lower urinary tract symptoms. *Neurourol Urodyn*. 2013 Jan; 32(1):88–91. <https://doi.org/10.1002/nau.22278> Epub 2012 Jun 12. PMID: [22692629](https://pubmed.ncbi.nlm.nih.gov/22692629/).
18. Di Salvo J, Nagabukuro H, Wickham LA, Abbadie C, DeMartino JA, Fitzmaurice A, et al. Pharmacological Characterization of a Novel Beta 3 Adrenergic Agonist, Vibegron: Evaluation of Antimuscarinic Receptor Selectivity for Combination Therapy for Overactive Bladder. *J Pharmacol Exp Ther*. 2017 Feb; 360(2):346–355. <https://doi.org/10.1124/jpet.116.237313> Epub 2016 Dec 13. PMID: [27965369](https://pubmed.ncbi.nlm.nih.gov/27965369/).
19. Wilson S, Chambers JK, Park JE, Ladurner A, Cronk DW, Chapman CG, et al. Agonist potency at the cloned human beta-3 adrenoceptor depends on receptor expression level and nature of assay. *J Pharmacol Exp Ther*. 1996 Oct; 279(1):214–21. PMID: [8858996](https://pubmed.ncbi.nlm.nih.gov/8858996/).
20. Keam SJ. Vibegron: First Global Approval. *Drugs*. 2018 Nov; 78(17):1835–1839. <https://doi.org/10.1007/s40265-018-1006-3> PMID: [30411311](https://pubmed.ncbi.nlm.nih.gov/30411311/).

21. Frankel J, Staskin D, Varano S, Kennelly MJ, Jankowich RA, Haag-Molkenteller C. An Evaluation of the Efficacy and Safety of Vibegron in the Treatment of Overactive Bladder. *Ther Clin Risk Manag*. 2022 Mar 3; 18:171–182. <https://doi.org/10.2147/TCRM.S310371> PMID: 35264853; PMCID: PMC8901416.
22. Maruyama I, Tatemichi S, Goi Y, Maruyama K, Hoyano Y, Yamazaki Y, et al. Effects of ritobegron (KUC-7483), a novel selective  $\beta$ 3-adrenoceptor agonist, on bladder function in cynomolgus monkey. *J Pharmacol Exp Ther*. 2012 Jul; 342(1):163–8. <https://doi.org/10.1124/jpet.112.191783> Epub 2012 Apr 16. PMID: 22511202.
23. Tasler S, Baumgartner R, Behr-Roussel D, Oger-Roussel S, Gorny D, Giuliano F, et al. An aryloxypropanolamine  $\beta$ 3-adrenoceptor agonist as bladder smooth muscle relaxant. *Eur J Pharm Sci*. 2012 Aug 15; 46(5):381–7. <https://doi.org/10.1016/j.ejps.2012.03.001> Epub 2012 Mar 10. PMID: 22430195.
24. Kenakin TP. *A Pharmacology Primer Techniques for more effective and strategic drug discovery*. 6th ed. Chapel Hill: Academic Press; 2022.
25. Brucker BM, King J, Mudd PN Jr, McHale K. Selectivity and Maximum Response of Vibegron and Mirabegron for  $\beta$ 3-Adrenergic Receptors. *Curr Ther Res Clin Exp*. 2022 May 14; 96:100674. <https://doi.org/10.1016/j.curtheres.2022.100674> PMID: 35693456; PMCID: PMC9184556.
26. Pharmaceuticals and Medical Devices Agency [Internet]. Tokyo: The summary technical documentation for BEOVA tablets 50 mg. [cited 2023 Apr 28]. Available from: <https://www.pmda.go.jp/drugs/2018/P20181016001/index.html>
27. Krauwinkel W, van Dijk J, Schaddelee M, Eltink C, Meijer J, Strabach G, et al. Pharmacokinetic properties of mirabegron, a  $\beta$ 3-adrenoceptor agonist: results from two phase I, randomized, multiple-dose studies in healthy young and elderly men and women. *Clin Ther*. 2012 Oct; 34(10):2144–60. <https://doi.org/10.1016/j.clinthera.2012.09.010> PMID: 23063375.
28. Okeke K, Angers S, Bouvier M, Michel MC. Agonist-induced desensitisation of  $\beta$ 3-adrenoceptors: Where, when, and how? *Br J Pharmacol*. 2019 Jul; 176(14):2539–2558. <https://doi.org/10.1111/bph.14633> Epub 2019 Apr 7. PMID: 30809805; PMCID: PMC6592865.
29. Michel MC, Vrydag W. Alpha1-, alpha2- and beta-adrenoceptors in the urinary bladder, urethra and prostate. *Br J Pharmacol*. 2006 Feb; 147 Suppl 2(Suppl 2):S88–119. <https://doi.org/10.1038/sj.bjp.0706619> PMID: 16465187; PMCID: PMC1751487.
30. Michel MC. Do  $\beta$ -adrenoceptor agonists induce homologous or heterologous desensitization in rat urinary bladder? *Naunyn Schmiedebergs Arch Pharmacol*. 2014 Mar; 387(3):215–24. <https://doi.org/10.1007/s00210-013-0936-2> Epub 2013 Nov 10. PMID: 24213882.
31. Yoshida M, Kakizaki H, Takahashi S, Nagai S, Kurose T. Long-term safety and efficacy of the novel  $\beta$ 3-adrenoreceptor agonist vibegron in Japanese patients with overactive bladder: A phase III prospective study. *Int J Urol*. 2018 Jul;25(7):668–675. <https://doi.org/10.1111/iju.13596> Epub 2018 May 11. PMID: 29752752.
32. Rodefeld MD, Beau SL, Schuessler RB, Boineau JP, Saffitz JE. Beta-adrenergic and muscarinic cholinergic receptor densities in the human sinoatrial node: identification of a high beta 2-adrenergic receptor density. *J Cardiovasc Electrophysiol*. 1996 Nov; 7(11):1039–49. <https://doi.org/10.1111/j.1540-8167.1996.tb00479.x> PMID: 8930735.
33. Weber MA, Haag-Molkenteller C, King J, Walker A, Mudd PN Jr, White WB. Effects of vibegron on ambulatory blood pressure in patients with overactive bladder: results from a double-blind, placebo-controlled trial. *Blood Press Monit*. 2022 Apr 1; 27(2):128–134. <https://doi.org/10.1097/MBP.0000000000000572> PMID: 34699409; PMCID: PMC8893125.
34. Staskin D, Frankel J, Varano S, Shortino D, Jankowich R, Mudd PN Jr. International Phase III, Randomized, Double-Blind, Placebo and Active Controlled Study to Evaluate the Safety and Efficacy of Vibegron in Patients with Symptoms of Overactive Bladder: EMPOWUR. *J Urol*. 2020 Aug; 204(2):316–324. <https://doi.org/10.1097/JU.0000000000000807> Epub 2020 Feb 18. PMID: 32068484.
